# Supplementary material
Source: publisher figshare collection journal article supplement (https://geolsoc.figshare.com/ndownloader/files/13303370)
Supplement: Supplementary file 1 [file 13303370]

## Sheet: Sheet2
Rock-Eval- & TOC/CNS Analysis
Well	Depth below top Cenozoic (m TVD)	Formation	S1 (mg/g)	S2 (mg/g)	S3 (mg/g)	Tmax (°C)	PP (mg/g)	PI (wt ratio)	HI (mg HC/g TOC)	OI (mg CO2/g TOC)	N [%]	Ctotal [%]	S [%]	Corg [%]
A	45	UHy	0.32	19.28	0.9	435	19.6	0.02	481.159	22.4607	0.187054	6.48534	1.61197	4.00699
A	104	UHy									0.113022	7.49642	1.93962	2.62865
A	180	UHy									0.153071	5.92981	2.56314	2.87295
A	269	UHy	0.15	13.51	0.69	434	13.66	0.01	460.281	23.508	0.150252	6.67417	2.01986	2.93517
A	342	UHy									0.123608	5.91214	2.05413	2.73247
A	365	UHy	0.38	17.39	2.96	424	17.77	0.02	486.488	82.8065	0.16	6.17	1.09	3.57
A	372	UHy									0.103737	6.2621	1.94277	1.85145
A	455	UHy	0.12	4.36	2.05	430	4.48	0.03	286.035	134.489	0.11	4.82	2.48	1.52
A	476	UHy	0.17	7.03	0.95	430	7.2	0.02	354.076	47.8481	0.09	5.68	2.21	1.99
A	485	UHy									0.11	5.12	2.9	2.48
A	509	LHy									0.1	5.18	2.82	2.18
A	516	LHy	0.58	10.2	1.14	427	10.78	0.05	415.169	46.4013	0.1	5.28	3.14	2.46
A	527	LHy	0.5	11.12	0.87	425	11.62	0.04	437.645	34.2402	0.1	5.76	3.17	2.54
A	535	LHy									0.07	5.38	2.47	1.44
A	554	LHy									0.07	5.3	2.55	1.14
A	561	LHy									0.08	5.88	2.59	1.99
A	568	LHy	0.34	4.9	2.61	429	5.24	0.06	332.403	177.056	0.08	5.44	2.37	1.47
A	575	LHy									0.07	6.2	1.97	1.2
A	636	Cer	0.06	1.62	3.15	431	1.68	0.04	181.013	351.971	0.08	5.06	1.59	0.89
A	769	CyM&ME	0.04	0.36	1.68	437	0.4	0.1	76.3857	356.467	0.07	3.76	0.8	0.47
A	803	CyM&ME									0.0561561	4.21015	0.183229	0.510477
A	885	CyM&ME	0.04	0.38	2.37	433	0.42	0.1	55.3398	345.146	0.06	4.19	0.06	0.69
A	900	CyM&ME	0.07	0.32	3	433	0.39	0.18	69.4938	651.505	0.06	4.48	0.11	0.46
A	925	RpC									0.07	3.72	0.14	0.52
A	935	RpC									0.1	3.2	0.42	0.68
A	945	RpC	0.17	4.23	1.02	437	4.4	0.04	234.296	56.4969	0.17	2.66	1.42	1.81
A	952	RpC	0.24	8.69	0.67	432	8.93	0.03	291.745	22.4936	0.18	4.19	2.73	2.98
A	964	RpC									0.16	4.01	1.85	2.59
A	970	RpC	0.5	10.29	0.67	434	10.79	0.05	372.204	24.2349	0.16	4.45	2.01	2.76
A	983	RpC									0.16	4.24	2.36	2.8
A	990	PE	0.23	5.95	0.71	435	6.18	0.04	290.948	34.7181	0.13	4.2	1.7	2.05
A	1001	PE									0.15	4.25	2.1	2.54
A	1006	PE									0.14	4.68	2.64	2.33
A	1008	PE									0.14	4.81	2.5	2.44
A	1011	PE									0.09	3.25	0.71	0.84
A	1013	PE	0.22	6.89	0.68	435	7.11	0.03	266.244	26.2767	0.16	3.99	2.1	2.59
A	1015	PE									0.12	3.6	1.69	1.73
A	1020	PE	0.12	2.97	0.64	436	3.09	0.04	136.076	29.3228	0.14	3.76	1.9	2.18
Well	Depth below top Cenozoic (m TVD)	Formation	S1 (mg/g)	S2 (mg/g)	S3 (mg/g)	Tmax (°C)	PP (mg/g)	PI (wt ratio)	HI (mg HC/g TOC)	OI (mg CO2/g TOC)	N [%]	Ctotal [%]	S [%]	Corg [%]
B	10	UHy	0.21	7.51	1.4	437	7.72	0.03	316.347	58.9728	0.13993	4.27746	2.10702	2.37397
B	105	UHy	0.26	13.47	1.22	434	13.73	0.02	453.95	41.115	0.130762	6.76838	2.28526	2.96729
B	305	UHy	0.24	14.52	0.88	433	14.76	0.02	500.354	30.3245	0.17861	6.04764	2.24824	2.90195
B	400	UHy	0.26	13.86	0.87	432	14.12	0.02	410.741	25.7824	0.202662	4.6116	2.88678	3.37439
B	450	UHy	0.18	7.77	0.61	428	7.95	0.02	401.115	31.4904	0.105173	8.51008	0.495509	1.9371
B	475	UHy	0.33	13.39	1.16	429	13.72	0.02	387.951	33.6089	0.159837	7.36848	2.24851	3.45147
B	495	UHy									0.151049	6.29936	2.43667	2.86756
B	510	UHy									0.103218	8.4367	0.702294	2.18257
B	525	LHy	0.38	11.67	0.83	429	12.05	0.03	445.285	31.6698	0.139849	6.41141	2.36231	2.62079
B	545	LHy	0.13	4.64	0.46	429	4.77	0.03	274.609	27.2242	0.0735009	9.08992	0.535716	1.68968
B	565	LHy									0.133075	5.6233	2.15441	1.56643
B	575	LHy									0.135752	5.88776	1.89115	2.07928
B	605	LHy	0.35	12.42	0.77	428	12.77	0.03	487.167	30.2028	0.133146	6.23926	2.84703	2.54944
B	635	LHy	0.29	7.81	0.85	426	8.1	0.04	387.029	42.1223	0.12386	5.15733	2.93333	2.01794
B	665	LHy									0.0899569	5.9922	3.60903	1.50103
B	705	LHy									0.118654	4.84951	3.77352	1.78407
B	725	LHy	0.29	9.27	0.92	426	9.56	0.03	414.943	41.181	0.125637	4.71329	3.10096	2.23404
B	760	LHy									0.109664	6.46515	1.1489	1.98531
B	780	LHy									0.0890246	6.72161	1.19186	2.05078
B	795	LHy	0.54	8.29	0.87	425	8.83	0.06	397.314	41.6964	0.0995041	6.36632	1.13121	2.08651
B	820	CyM	0.09	0.59	0.83	427	0.68	0.13	97.9689	137.821	0.0608119	4.4476	0.748192	0.602232
B	865	CyM & ME	0.08	1.06	0.72	429	1.14	0.07	149.769	101.73	0.0652667	4.38842	0.737272	0.707758
B	975	RpC	1.52	18.54	0.22	430	20.06	0.08	1958.81	23.2437	0.121616	2.93605	0.491627	0.946491
B	985	RpC	0.11	1.63	1.01	430	1.74	0.06	95.4674	59.1547	0.177865	2.83851	0.473148	1.70739
B	995	RpC									0.163828	3.61221	0.599983	2.06442
B	1005	RpC	0.19	8.19	0.69	431	8.38	0.02	303.911	25.6042	0.17959	4.30037	0.719705	2.69487
B	1040	RpC	0.37	2.31	0.81	432	2.68	0.14	232.656	81.5805	0.123568	3.71351	0.616755	0.992884
B	1042	RpC									0.178165	3.73561	0.620145	2.11378
B	1052	UPE	0.37	4.68	0.66	432	5.05	0.07	247.964	34.9692	0.173152	3.47902	0.585646	1.88737
B	1072	MPE									0.206584	3.93932	0.654203	2.12369
B	1088	MPE									0.27352	4.27807	1.34877	2.29676
B	1104	LPE	0.92	4.35	0.75	430	5.27	0.17	275.658	47.5273	0.150042	4.06698	1.26201	1.57804
B	1116	LPE	2.49	8.07	0.97	428	10.56	0.24	336.554	40.4532	0.276243	4.56737	1.16037	2.39783

## Sheet: Sheet3
	Palynofacies analysis & Optical kerogen analysis
Well	MD	Formation	# particles	1	2	3	4	Phyclasts%/totalOM	Inertinit %/total OM	Vit total	Cut total	Sporomo all%/totalOM	Spores total	Pollen total	terr AOM/TOTALOM	mar AOM%/totalOM	AOM%/totalOM	Phytopl total	Pras total	Acr total	Dino total	Leios total	lak algae total	Foram acc	Fungi	1	2	3	4	Phyclasts%/totalOM	Inertinit %/total OM	Vit total	Cut total	Sporomo all%/totalOM	Spores total	Pollen total	terr AOM/TOTALOM	mar AOM%/totalOM	AOM%/totalOM	Phytopl total	Pras total	Acr total	Dino total	Leios total	lak algae total	Foram acc	Fungi
A	690	UHY	250	0.688	0.156	0.108	0.048	0.156	0.048	0.1	0.008	0.128	0.096	0.032	0	0.648	0.648	0.064	0.004	0	0.028	0.032	0.004	0	0	68.8	15.6	10.8	4.8	15.6	4.8	10	0.8	12.8	9.6	3.2	0	64.8	64.8	6.4	0.4	0	2.8	3.2	0.4	0	0
A	790	UHY	222	0.77027	0.0810811	0.0990991	0.0495495	0.148649	0.0495495	0.0990991	0	0.0765766	0.045045	0.0315315	0	0.743243	0.743243	0.0315315	0.00900901	0	0.0045045	0.018018	0	0	0	77.027	8.10811	9.90991	4.95495	14.8649	4.95495	9.90991	0	7.65766	4.5045	3.15315	0	74.3243	74.3243	3.15315	0.900901	0	0.45045	1.8018	0	0	0
A	880	UHY	280	0.45	0.278571	0.196429	0.075	0.271429	0.075	0.196429	0	0.228571	0.153571	0.075	0	0.410714	0.410714	0.0892857	0.00357143	0	0.05	0.0357143	0	0	0	45	27.8571	19.6429	7.5	27.1429	7.5	19.6429	0	22.8571	15.3571	7.5	0	41.0714	41.0714	8.92857	0.357143	0	5	3.57143	0	0	0
A	980	UHY	337	0.462908	0.225519	0.228487	0.0830861	0.311573	0.0830861	0.207715	0.0207715	0.148368	0.0474777	0.10089	0	0.430267	0.430267	0.109792	0.00890208	0	0.0771513	0.0237389	0	0	0	46.2908	22.5519	22.8487	8.30861	31.1573	8.30861	20.7715	2.07715	14.8368	4.74777	10.089	0	43.0267	43.0267	10.9792	0.890208	0	7.71513	2.37389	0	0	0
A	1070	UHY	392	0.466837	0.188776	0.265306	0.0790816	0.344388	0.0790816	0.237245	0.0280612	0.102041	0.0433673	0.0586735	0	0.451531	0.451531	0.102041	0.00765306	0	0.0867347	0.00765306	0	0	0	46.6837	18.8776	26.5306	7.90816	34.4388	7.90816	23.7245	2.80612	10.2041	4.33673	5.86735	0	45.1531	45.1531	10.2041	0.765306	0	8.67347	0.765306	0	0	0
A	1160	UHY	319	0.451411	0.30721	0.181818	0.0595611	0.241379	0.0595611	0.181818	0	0.15047	0.0407524	0.109718	0	0.438871	0.438871	0.169279	0.0125392	0	0.15674	0	0	0	0	45.1411	30.721	18.1818	5.95611	24.1379	5.95611	18.1818	0	15.047	4.07524	10.9718	0	43.8871	43.8871	16.9279	1.25392	0	15.674	0	0	0	0
A	1190	UHY	354	0.423729	0.381356	0.161017	0.0338983	0.194915	0.0338983	0.161017	0	0.186441	0.0847458	0.101695	0	0.403955	0.403955	0.206215	0	0	0.194915	0.0112994	0.00847458	0	0	42.3729	38.1356	16.1017	3.38983	19.4915	3.38983	16.1017	0	18.6441	8.47458	10.1695	0	40.3955	40.3955	20.6215	0	0	19.4915	1.12994	0.847458	0	0
A	1160	UHY	319	0.451411	0.30721	0.181818	0.0595611	0.241379	0.0595611	0.181818	0	0.15047	0.0407524	0.109718	0	0.438871	0.438871	0.169279	0.0125392	0	0.15674	0	0	0	0	45.1411	30.721	18.1818	5.95611	24.1379	5.95611	18.1818	0	15.047	4.07524	10.9718	0	43.8871	43.8871	16.9279	1.25392	0	15.674	0	0	0	0
A	1170	UHY	274	0.510949	0.288321	0.142336	0.0583942	0.20073	0.0583942	0.142336	0	0.226277	0.0656934	0.160584	0	0.459854	0.459854	0.0729927	0	0	0.0620438	0.0109489	0.040146	0	0	51.0949	28.8321	14.2336	5.83942	20.073	5.83942	14.2336	0	22.6277	6.56934	16.0584	0	45.9854	45.9854	7.29927	0	0	6.20438	1.09489	4.0146	0	0
A	1200	UHY	281	0.483986	0.309609	0.149466	0.0569395	0.206406	0.0569395	0.149466	0	0.199288	0.106762	0.0925267	0	0.405694	0.405694	0.188612	0.0533808	0	0.11032	0.024911	0	0	0	48.3986	30.9609	14.9466	5.69395	20.6406	5.69395	14.9466	0	19.9288	10.6762	9.25267	0	40.5694	40.5694	18.8612	5.33808	0	11.032	2.4911	0	0	0
A	1220	UHY	290	0.451724	0.324138	0.155172	0.0689655	0.224138	0.0689655	0.124138	0.0310345	0.282759	0.0689655	0.213793	0	0.413793	0.413793	0.0793103	0.0137931	0	0.0413793	0.0241379	0	0	0	45.1724	32.4138	15.5172	6.89655	22.4138	6.89655	12.4138	3.10345	28.2759	6.89655	21.3793	0	41.3793	41.3793	7.93103	1.37931	0	4.13793	2.41379	0	0	0
A	1230	UHY	330	0.269697	0.615152	0.0909091	0.0242424	0.115152	0.0242424	0.0818182	0.00909091	0.190909	0.0757576	0.115152	0	0.248485	0.248485	0.445455	0	0	0.424242	0.0212121	0	0	0	26.9697	61.5152	9.09091	2.42424	11.5152	2.42424	8.18182	0.909091	19.0909	7.57576	11.5152	0	24.8485	24.8485	44.5455	0	0	42.4242	2.12121	0	0	0
A	1250	LHY	277	0.429603	0.32852	0.187726	0.0541516	0.241877	0.0541516	0.148014	0.0397112	0.194946	0.0541516	0.140794	0	0.382671	0.382671	0.180505	0.00722022	0	0.133574	0.0397112	0	0	0	42.9603	32.852	18.7726	5.41516	24.1877	5.41516	14.8014	3.97112	19.4946	5.41516	14.0794	0	38.2671	38.2671	18.0505	0.722022	0	13.3574	3.97112	0	0	0
A	1260	LHY	277	0.34657	0.310469	0.31769	0.0252708	0.306859	0.0252708	0.274368	0.00722022	0.238267	0.0505415	0.187726	0.0361011	0.32852	0.364621	0.0902527	0.0180505	0	0.0722022	0	0	0	0	34.657	31.0469	31.769	2.52708	30.6859	2.52708	27.4368	0.722022	23.8267	5.05415	18.7726	3.61011	32.852	36.4621	9.02527	1.80505	0	7.22022	0	0	0	0
A	1265	LHY	303	0.534653	0.260726	0.138614	0.0660066	0.20462	0.0660066	0.125413	0.0132013	0.168317	0.0594059	0.108911	0	0.478548	0.478548	0.145215	0.0231023	0	0.0924092	0.029703	0.00330033	0	0	53.4653	26.0726	13.8614	6.60066	20.462	6.60066	12.5413	1.32013	16.8317	5.94059	10.8911	0	47.8548	47.8548	14.5215	2.31023	0	9.24092	2.9703	0.330033	0	0
A	1270	LHY	331	0.407855	0.365559	0.163142	0.0634441	0.226586	0.0634441	0.135952	0.0271903	0.244713	0.0362538	0.208459	0	0.36858	0.36858	0.160121	0.0120846	0	0.120846	0.0271903	0	0	0	40.7855	36.5559	16.3142	6.34441	22.6586	6.34441	13.5952	2.71903	24.4713	3.62538	20.8459	0	36.858	36.858	16.0121	1.20846	0	12.0846	2.71903	0	0	0
A	1290	LHY	361	0.382271	0.310249	0.243767	0.0637119	0.307479	0.0637119	0.243767	0	0.199446	0.0360111	0.163435	0	0.351801	0.351801	0.135734	0.0249307	0	0.110803	0	0.00554017	0	0	38.2271	31.0249	24.3767	6.37119	30.7479	6.37119	24.3767	0	19.9446	3.60111	16.3435	0	35.1801	35.1801	13.5734	2.49307	0	11.0803	0	0.554017	0	0
A	1300	LHY	341	0.354839	0.416422	0.170088	0.058651	0.228739	0.058651	0.146628	0.0234604	0.184751	0.0703812	0.11437	0	0.348974	0.348974	0.237537	0	0	0.231672	0.0058651	0	0	0	35.4839	41.6422	17.0088	5.8651	22.8739	5.8651	14.6628	2.34604	18.4751	7.03812	11.437	0	34.8974	34.8974	23.7537	0	0	23.1672	0.58651	0	0	0
A	1310	LHY	261	0.287356	0.51341	0.0651341	0.1341	0.199234	0.1341	0.0498084	0.0153257	0.126437	0.0498084	0.0766284	0	0.272031	0.272031	0.402299	0	0	0.386973	0.0153257	0	0	0	28.7356	51.341	6.51341	13.41	19.9234	13.41	4.98084	1.53257	12.6437	4.98084	7.66284	0	27.2031	27.2031	40.2299	0	0	38.6973	1.53257	0	0	0
A	1320	LHY	313	0.415335	0.456869	0.0638978	0.0638978	0.111821	0.0638978	0.0479233	0	0.271565	0.169329	0.102236	0.0159744	0.370607	0.386581	0.201278	0.00638978	0	0.185304	0.00958466	0.028754	0	0	41.5335	45.6869	6.38978	6.38978	11.1821	6.38978	4.79233	0	27.1565	16.9329	10.2236	1.59744	37.0607	38.6581	20.1278	0.638978	0	18.5304	0.958466	2.8754	0	0
A	1390	CeB	329	0.37386	0.300912	0.221884	0.103343	0.243161	0.103343	0.139818	0	0.218845	0.0273556	0.191489	0.0820669	0.361702	0.443769	0.0911854	0.00911854	0	0.0820669	0	0.00303951	0	0	37.386	30.0912	22.1884	10.3343	24.3161	10.3343	13.9818	0	21.8845	2.73556	19.1489	8.20669	36.1702	44.3769	9.11854	0.911854	0	8.20669	0	0.303951	0	0
A	1520	CyM& MeB	540	0	0.0481481	0.807407	0.144444	0.905556	0.144444	0.403704	0.357407	0.0314815	0.0148148	0.0166667	0.0462963	0	0.0462963	0.0166667	0	0	0.0166667	0	0	0	0	0	4.81481	80.7407	14.4444	90.5556	14.4444	40.3704	35.7407	3.14815	1.48148	1.66667	4.62963	0	4.62963	1.66667	0	0	1.66667	0	0	0	0
A	1580	CyM& MeB	333	0.468468	0.24024	0.165165	0.126126	0.291291	0.126126	0.153153	0.012012	0.201201	0.0870871	0.114114	0	0.465465	0.465465	0.039039	0	0	0.039039	0	0.003003	0	0	46.8468	24.024	16.5165	12.6126	29.1291	12.6126	15.3153	1.2012	20.1201	8.70871	11.4114	0	46.5465	46.5465	3.9039	0	0	3.9039	0	0.3003	0	0
A	1660	CyM& MeB	284	0.00352113	0.109155	0.697183	0.190141	0.84507	0.190141	0.633803	0.0211268	0.0352113	0.0352113	0	0.0422535	0	0.0422535	0.0774648	0.00352113	0	0.0739437	0	0	0	0	0.352113	10.9155	69.7183	19.0141	84.507	19.0141	63.3803	2.11268	3.52113	3.52113	0	4.22535	0	4.22535	7.74648	0.352113	0	7.39437	0	0	0	0
A	1705	RpC	348	0.00862069	0.155172	0.681034	0.155172	0.793103	0.155172	0.597701	0.0402299	0.0862069	0.0402299	0.045977	0.0431034	0	0.0431034	0.0775862	0.00862069	0	0.0689655	0	0	0	0	0.862069	15.5172	68.1034	15.5172	79.3103	15.5172	59.7701	4.02299	8.62069	4.02299	4.5977	4.31034	0	4.31034	7.75862	0.862069	0	6.89655	0	0	0	0
A	1710	RpC	386	0.0207254	0.0958549	0.813472	0.0699482	0.805699	0.0699482	0.689119	0.0466321	0.0725389	0.00777202	0.0647668	0.0777202	0	0.0777202	0.0440415	0	0	0.0233161	0.0207254	0	0	0	2.07254	9.58549	81.3472	6.99482	80.5699	6.99482	68.9119	4.66321	7.25389	0.777202	6.47668	7.77202	0	7.77202	4.40415	0	0	2.33161	2.07254	0	0	0
A	1715	RpC	356	0.00842697	0.143258	0.808989	0.0393258	0.72191	0.0393258	0.648876	0.0337079	0.0533708	0.0337079	0.0196629	0.126404	0	0.126404	0.0983146	0.00842697	0	0.0898876	0	0	0	0	0.842697	14.3258	80.8989	3.93258	72.191	3.93258	64.8876	3.37079	5.33708	3.37079	1.96629	12.6404	0	12.6404	9.83146	0.842697	0	8.98876	0	0	0	0
A	1720	RpC	288	0	0.0277778	0.881944	0.0902778	0.819444	0.0902778	0.708333	0.0208333	0.0208333	0.0208333	0	0.152778	0	0.152778	0.00694444	0	0	0.00694444	0	0	0	0	0	2.77778	88.1944	9.02778	81.9444	9.02778	70.8333	2.08333	2.08333	2.08333	0	15.2778	0	15.2778	0.694444	0	0	0.694444	0	0	0	0
A	1725	RpC	357	0	0.128852	0.789916	0.0812325	0.728291	0.0812325	0.613445	0.0336134	0.0532213	0.0392157	0.0140056	0.142857	0	0.142857	0.0756303	0	0	0.0756303	0	0	0	0	0	12.8852	78.9916	8.12325	72.8291	8.12325	61.3445	3.36134	5.32213	3.92157	1.40056	14.2857	0	14.2857	7.56303	0	0	7.56303	0	0	0	0
A	1730	RpC	266	0.0150376	0.0526316	0.902256	0.0300752	0.706767	0.0300752	0.661654	0.0150376	0.037594	0.0225564	0.0150376	0.225564	0	0.225564	0.0225564	0.0075188	0	0.0150376	0	0.0075188	0	0	1.50376	5.26316	90.2256	3.00752	70.6767	3.00752	66.1654	1.50376	3.7594	2.25564	1.50376	22.5564	0	22.5564	2.25564	0.75188	0	1.50376	0	0.75188	0	0
A	1735	PB	274	0.040146	0.0948905	0.773723	0.0912409	0.791971	0.0912409	0.70073	0	0.0729927	0.0620438	0.0109489	0.0729927	0.0109489	0.0839416	0.0291971	0	0	0.0218978	0.00729927	0.0218978	0	0	4.0146	9.48905	77.3723	9.12409	79.1971	9.12409	70.073	0	7.29927	6.20438	1.09489	7.29927	1.09489	8.39416	2.91971	0	0	2.18978	0.729927	2.18978	0	0
A	1737.5	PB	224	0.0223214	0.102679	0.830357	0.0446429	0.75	0.0446429	0.674107	0.03125	0.0178571	0.0178571	0	0.125	0.0223214	0.147321	0.0848214	0	0	0.0848214	0	0	0	0	2.23214	10.2679	83.0357	4.46429	75	4.46429	67.4107	3.125	1.78571	1.78571	0	12.5	2.23214	14.7321	8.48214	0	0	8.48214	0	0	0	0
A	1740	PB	259	0.0694981	0.0849421	0.698842	0.146718	0.814672	0.146718	0.667954	0	0.0617761	0.023166	0.03861	0.030888	0.0617761	0.0926641	0.030888	0.00772201	0	0.023166	0	0	0	0	6.94981	8.49421	69.8842	14.6718	81.4672	14.6718	66.7954	0	6.17761	2.3166	3.861	3.0888	6.17761	9.26641	3.0888	0.772201	0	2.3166	0	0	0	0
A	1745	PB	264	0.0833333	0.0643939	0.746212	0.106061	0.80303	0.106061	0.69697	0	0.0151515	0	0.0151515	0.0492424	0.0492424	0.0984848	0.0833333	0.0189394	0	0.0492424	0.0151515	0	0	0	8.33333	6.43939	74.6212	10.6061	80.303	10.6061	69.697	0	1.51515	0	1.51515	4.92424	4.92424	9.84848	8.33333	1.89394	0	4.92424	1.51515	0	0	0
A	1747.5	PB	235	0.0297872	0.0468085	0.757447	0.165957	0.902128	0.165957	0.73617	0	0.0425532	0.0340426	0.00851064	0.0212766	0.0297872	0.0510638	0.00425532	0	0	0.00425532	0	0	0	0	2.97872	4.68085	75.7447	16.5957	90.2128	16.5957	73.617	0	4.25532	3.40426	0.851064	2.12766	2.97872	5.10638	0.425532	0	0	0.425532	0	0	0	0
A	1750	PB	331	0.135952	0.187311	0.55287	0.123867	0.661631	0.123867	0.507553	0.0302115	0.0755287	0.0574018	0.0181269	0.0151057	0.135952	0.151057	0.111782	0	0	0.111782	0	0	0	0	13.5952	18.7311	55.287	12.3867	66.1631	12.3867	50.7553	3.02115	7.55287	5.74018	1.81269	1.51057	13.5952	15.1057	11.1782	0	0	11.1782	0	0	0	0
A	1752.5	PB	281	0.0284698	0.120996	0.686833	0.163701	0.797153	0.163701	0.633452	0	0.0854093	0.0462633	0.0391459	0.0533808	0.0284698	0.0818505	0.0355872	0	0	0.0355872	0	0	0	0	2.84698	12.0996	68.6833	16.3701	79.7153	16.3701	63.3452	0	8.54093	4.62633	3.91459	5.33808	2.84698	8.18505	3.55872	0	0	3.55872	0	0	0	0
A	1755	PB	238	0.197479	0.151261	0.483193	0.168067	0.617647	0.168067	0.436975	0.012605	0.113445	0.0630252	0.0504202	0.0336134	0.189076	0.222689	0.0462185	0.00840336	0	0.0378151	0	0	0	0	19.7479	15.1261	48.3193	16.8067	61.7647	16.8067	43.6975	1.2605	11.3445	6.30252	5.04202	3.36134	18.9076	22.2689	4.62185	0.840336	0	3.78151	0	0	0	0
A	1760	PB	310	0.0677419	0.112903	0.629032	0.190323	0.690323	0.190323	0.474194	0.0258065	0.0967742	0.0483871	0.0483871	0.129032	0.0580645	0.187097	0.0258065	0.00645161	0	0.016129	0.00322581	0	0	0	6.77419	11.2903	62.9032	19.0323	69.0323	19.0323	47.4194	2.58065	9.67742	4.83871	4.83871	12.9032	5.80645	18.7097	2.58065	0.645161	0	1.6129	0.322581	0	0	0
																										0	0	0	0	0	0	0	0	0	0	0	0	0	0	0	0	0	0	0	0	0	0
																										0	0	0	0	0	0	0	0	0	0	0	0	0	0	0	0	0	0	0	0	0	0
Well	MD	Fm	total partikel	1	2	3	4	Phyclasts%/totalOM	Inertinit %/total OM	Vit total	Cut total	Sporomo all%/totalOM	Spores total	Pollen total	terr AOM/TOTALOM	mar AOM%/totalOM	AOM%/totalOM	Phytopl total	Pras total	Acr total	Dino total	Leios total	lak algae total	Foram acc	Fungi	100	200	300	400	#VALUE!	#VALUE!	#VALUE!	#VALUE!	#VALUE!	#VALUE!	#VALUE!	#VALUE!	#VALUE!	#VALUE!	#VALUE!	#VALUE!	#VALUE!	#VALUE!	#VALUE!	#VALUE!	#VALUE!	#VALUE!
B	850	UHyB	319	0.460815	0.115987	0.366771	0.0564263	0.407524	0.0564263	0.335423	0.015674	0.112853	0.0501567	0.0626959	0.015674	0.454545	0.470219	0.00940439	0.00626959	0	0.0031348	0	0	0	0	46.0815	11.5987	36.6771	5.64263	40.7524	5.64263	33.5423	1.5674	11.2853	5.01567	6.26959	1.5674	45.4545	47.0219	0.940439	0.626959	0	0.31348	0	0	0	0
B	945	UHyB	303	0.50495	0.148515	0.280528	0.0660066	0.313531	0.0660066	0.247525	0	0.148515	0.0759076	0.0726073	0.0330033	0.478548	0.511551	0.0264026	0.00990099	0	0	0.0165017	0	0	0	50.495	14.8515	28.0528	6.60066	31.3531	6.60066	24.7525	0	14.8515	7.59076	7.26073	3.30033	47.8548	51.1551	2.64026	0.990099	0	0	1.65017	0	0	0
B	1040	UHyB	318	0.660377	0.169811	0.141509	0.0283019	0.169811	0.0283019	0.113208	0.0283019	0.116352	0.0880503	0.0283019	0	0.597484	0.597484	0.116352	0.0345912	0	0.0534591	0.0283019	0	0	0	66.0377	16.9811	14.1509	2.83019	16.9811	2.83019	11.3208	2.83019	11.6352	8.80503	2.83019	0	59.7484	59.7484	11.6352	3.45912	0	5.34591	2.83019	0	0	0
B	1145	UHyB	316	0.674051	0.306962	0.0189873	0	0.0189873	0	0.0189873	0	0.294304	0.113924	0.18038	0	0.617089	0.617089	0.0696203	0.0348101	0	0.0126582	0.0221519	0	0	0	67.4051	30.6962	1.89873	0	1.89873	0	1.89873	0	29.4304	11.3924	18.038	0	61.7089	61.7089	6.96203	3.48101	0	1.26582	2.21519	0	0	0
B	1240	UHyB	288	0.520833	0.434028	0.03125	0.0138889	0.0451389	0.0138889	0.0277778	0.00347222	0.159722	0.0625	0.0972222	0	0.46875	0.46875	0.326389	0.0520833	0	0.274306	0	0	0	0	52.0833	43.4028	3.125	1.38889	4.51389	1.38889	2.77778	0.347222	15.9722	6.25	9.72222	0	46.875	46.875	32.6389	5.20833	0	27.4306	0	0	0	0
B	1290	UHyB	372	0.502688	0.271505	0.188172	0.0376344	0.225806	0.0376344	0.158602	0.0295699	0.25	0.126344	0.123656	0	0.483871	0.483871	0.0349462	0.00806452	0	0.0215054	0.00537634	0.00537634	0	0	50.2688	27.1505	18.8172	3.76344	22.5806	3.76344	15.8602	2.95699	25	12.6344	12.3656	0	48.3871	48.3871	3.49462	0.806452	0	2.15054	0.537634	0.537634	0	0
B	1315	UHyB	383	0.436031	0.237598	0.27154	0.0548303	0.326371	0.0548303	0.261097	0.0104439	0.174935	0.0861619	0.0887728	0	0.436031	0.436031	0.0626632	0	0	0.0626632	0	0	0	0	43.6031	23.7598	27.154	5.48303	32.6371	5.48303	26.1097	1.04439	17.4935	8.61619	8.87728	0	43.6031	43.6031	6.26632	0	0	6.26632	0	0	0	0
B	1335	UHyB	276	0.547101	0.293478	0.119565	0.0398551	0.15942	0.0398551	0.0869565	0.0326087	0.163043	0.0905797	0.0724638	0	0.547101	0.547101	0.130435	0	0	0.130435	0	0	0	0	54.7101	29.3478	11.9565	3.98551	15.942	3.98551	8.69565	3.26087	16.3043	9.05797	7.24638	0	54.7101	54.7101	13.0435	0	0	13.0435	0	0	0	0
B	1350	UHyB	269	0.561338	0.29368	0.107807	0.0371747	0.144981	0.0371747	0.107807	0	0.249071	0.148699	0.100372	0	0.561338	0.561338	0.0446097	0	0	0.0446097	0	0	0	0	56.1338	29.368	10.7807	3.71747	14.4981	3.71747	10.7807	0	24.9071	14.8699	10.0372	0	56.1338	56.1338	4.46097	0	0	4.46097	0	0	0	0
B	1365	LHyB	269	0.609665	0.312268	0.0669145	0.0111524	0.0780669	0.0111524	0.0669145	0	0.219331	0.0966543	0.122677	0	0.591078	0.591078	0.111524	0.0111524	0	0.0929368	0.00743494	0	0	0	60.9665	31.2268	6.69145	1.11524	7.80669	1.11524	6.69145	0	21.9331	9.66543	12.2677	0	59.1078	59.1078	11.1524	1.11524	0	9.29368	0.743494	0	0	0
B	1385	LHyB	250	0.664	0.256	0.08	0	0.08	0	0.08	0	0.148	0.076	0.072	0	0.612	0.612	0.156	0.036	0	0.108	0.012	0.004	0	0	66.4	25.6	8	0	8	0	8	0	14.8	7.6	7.2	0	61.2	61.2	15.6	3.6	0	10.8	1.2	0.4	0	0
B	1405	LHyB	287	0.473868	0.369338	0.135889	0.0209059	0.156794	0.0209059	0.135889	0	0.271777	0.0662021	0.205575	0	0.404181	0.404181	0.142857	0.0313589	0	0.097561	0.0139373	0.0243902	0	0	47.3868	36.9338	13.5889	2.09059	15.6794	2.09059	13.5889	0	27.1777	6.62021	20.5575	0	40.4181	40.4181	14.2857	3.13589	0	9.7561	1.39373	2.43902	0	0
B	1415	LHyB	307	0.472313	0.29316	0.156352	0.0781759	0.234528	0.0781759	0.143322	0.0130293	0.185668	0.0521173	0.13355	0	0.433225	0.433225	0.13355	0.00325733	0	0.107492	0.0228013	0.0130293	0	0	47.2313	29.316	15.6352	7.81759	23.4528	7.81759	14.3322	1.30293	18.5668	5.21173	13.355	0	43.3225	43.3225	13.355	0.325733	0	10.7492	2.28013	1.30293	0	0
B	1445	LHyB	300	0.47	0.4	0.0833333	0.0466667	0.13	0.0466667	0.07	0.0133333	0.23	0.0566667	0.173333	0	0.413333	0.413333	0.213333	0.0266667	0	0.17	0.0166667	0.0133333	0	0.0233333	47	40	8.33333	4.66667	13	4.66667	7	1.33333	23	5.66667	17.3333	0	41.3333	41.3333	21.3333	2.66667	0	17	1.66667	1.33333	0	2.33333
B	1475	LHyB	325	0.473846	0.304615	0.196923	0.0246154	0.221538	0.0246154	0.187692	0.00923077	0.187692	0.0892308	0.0984615	0	0.418462	0.418462	0.141538	0.0123077	0	0.116923	0.0123077	0.0307692	0	0	47.3846	30.4615	19.6923	2.46154	22.1538	2.46154	18.7692	0.923077	18.7692	8.92308	9.84615	0	41.8462	41.8462	14.1538	1.23077	0	11.6923	1.23077	3.07692	0	0
B	1505	LHyB	332	0.225904	0.394578	0.274096	0.105422	0.370482	0.105422	0.253012	0.0120482	0.268072	0.0572289	0.210843	0.00903614	0.21988	0.228916	0.13253	0.0060241	0	0.126506	0	0	0	0	22.5904	39.4578	27.4096	10.5422	37.0482	10.5422	25.3012	1.20482	26.8072	5.72289	21.0843	0.903614	21.988	22.8916	13.253	0.60241	0	12.6506	0	0	0	0
B	1545	LHyB	291	0.37457	0.274914	0.268041	0.0824742	0.350515	0.0824742	0.254296	0.0137457	0.237113	0.04811	0.189003	0	0.350515	0.350515	0.0378007	0	0	0.0378007	0	0.024055	0	0	37.457	27.4914	26.8041	8.24742	35.0515	8.24742	25.4296	1.37457	23.7113	4.811	18.9003	0	35.0515	35.0515	3.78007	0	0	3.78007	0	2.4055	0	0
B	1565	LHyB	255	0.513725	0.27451	0.152941	0.0588235	0.211765	0.0588235	0.133333	0.0196078	0.0980392	0.0235294	0.0745098	0	0.47451	0.47451	0.215686	0.0392157	0	0.176471	0	0	0	0.0196078	51.3725	27.451	15.2941	5.88235	21.1765	5.88235	13.3333	1.96078	9.80392	2.35294	7.45098	0	47.451	47.451	21.5686	3.92157	0	17.6471	0	0	0	1.96078
B	1600	LHyB	284	0.373239	0.274648	0.292254	0.0598592	0.352113	0.0598592	0.292254	0	0.18662	0.0422535	0.144366	0	0.355634	0.355634	0.105634	0.0176056	0	0.0880282	0	0	0	0	37.3239	27.4648	29.2254	5.98592	35.2113	5.98592	29.2254	0	18.662	4.22535	14.4366	0	35.5634	35.5634	10.5634	1.76056	0	8.80282	0	0	0	0
B	1620	LHyB	297	0.326599	0.245791	0.326599	0.10101	0.427609	0.10101	0.299663	0.026936	0.20202	0.030303	0.171717	0	0.313131	0.313131	0.0572391	0.013468	0	0.043771	0	0	0	0	32.6599	24.5791	32.6599	10.101	42.7609	10.101	29.9663	2.6936	20.202	3.0303	17.1717	0	31.3131	31.3131	5.72391	1.3468	0	4.3771	0	0	0	0
B	1635	LHyB	334	0.299401	0.290419	0.320359	0.0898204	0.41018	0.0898204	0.320359	0	0.242515	0.0508982	0.191617	0	0.269461	0.269461	0.0778443	0.00898204	0	0.0479042	0.0209581	0	0	0	29.9401	29.0419	32.0359	8.98204	41.018	8.98204	32.0359	0	24.2515	5.08982	19.1617	0	26.9461	26.9461	7.78443	0.898204	0	4.79042	2.09581	0	0	0
B	1660	CyM	374	0.342246	0.173797	0.360963	0.122995	0.483957	0.122995	0.34492	0.0160428	0.168449	0.0561497	0.112299	0	0.320856	0.320856	0.026738	0.00534759	0	0.00534759	0.0160428	0	0	0	34.2246	17.3797	36.0963	12.2995	48.3957	12.2995	34.492	1.60428	16.8449	5.61497	11.2299	0	32.0856	32.0856	2.6738	0.534759	0	0.534759	1.60428	0	0	0
B	1705	CyM & MeB	350	0.44	0.24	0.26	0.06	0.32	0.06	0.26	0	0.202857	0.0742857	0.128571	0	0.434286	0.434286	0.0428571	0.00571429	0	0.0371429	0	0	0	0.00571429	44	24	26	6	32	6	26	0	20.2857	7.42857	12.8571	0	43.4286	43.4286	4.28571	0.571429	0	3.71429	0	0	0	0.571429
B	1815	RpC	343	0.236152	0.212828	0.463557	0.0874636	0.55102	0.0874636	0.405248	0.058309	0.142857	0.0291545	0.113703	0	0.206997	0.206997	0.0816327	0	0	0.0699708	0.0116618	0.0174927	0	0	23.6152	21.2828	46.3557	8.74636	55.102	8.74636	40.5248	5.8309	14.2857	2.91545	11.3703	0	20.6997	20.6997	8.16327	0	0	6.99708	1.16618	1.74927	0	0
B	1825	RpC	291	0.0962199	0.0721649	0.707904	0.123711	0.831615	0.123711	0.676976	0.0309278	0.04811	0.0171821	0.0309278	0	0.0962199	0.0962199	0.024055	0	0	0.024055	0	0	0	0	9.62199	7.21649	70.7904	12.3711	83.1615	12.3711	67.6976	3.09278	4.811	1.71821	3.09278	0	9.62199	9.62199	2.4055	0	0	2.4055	0	0	0	0
B	1835	RpC	304	0.148026	0.161184	0.641447	0.0493421	0.674342	0.0493421	0.625	0	0.115132	0.0230263	0.0921053	0.0164474	0.141447	0.157895	0.0526316	0.00328947	0	0.0460526	0.00328947	0	0	0	14.8026	16.1184	64.1447	4.93421	67.4342	4.93421	62.5	0	11.5132	2.30263	9.21053	1.64474	14.1447	15.7895	5.26316	0.328947	0	4.60526	0.328947	0	0	0
B	1845	RpC	337	0.0949555	0.0949555	0.724036	0.0860534	0.694362	0.0860534	0.563798	0.0445104	0.0623145	0.00890208	0.0534125	0.115727	0.0712166	0.186944	0.0326409	0	0	0.0326409	0	0.0237389	0	0	9.49555	9.49555	72.4036	8.60534	69.4362	8.60534	56.3798	4.45104	6.23145	0.890208	5.34125	11.5727	7.12166	18.6944	3.26409	0	0	3.26409	0	2.37389	0	0
B	1880	RpC	285	0.37193	0.122807	0.463158	0.0421053	0.505263	0.0421053	0.452632	0.0105263	0.0736842	0.045614	0.0280702	0	0.37193	0.37193	0.0491228	0	0	0.0491228	0	0	0	0	37.193	12.2807	46.3158	4.21053	50.5263	4.21053	45.2632	1.05263	7.36842	4.5614	2.80702	0	37.193	37.193	4.91228	0	0	4.91228	0	0	0	0
B	1882	RpC	292	0.328767	0.140411	0.5	0.0308219	0.530822	0.0308219	0.5	0	0.140411	0.0376712	0.10274	0	0.328767	0.328767	0	0	0	0	0	0	0	0.010274	32.8767	14.0411	50	3.08219	53.0822	3.08219	50	0	14.0411	3.76712	10.274	0	32.8767	32.8767	0	0	0	0	0	0	0	1.0274
B	1892	UPB	276	0.130435	0.0833333	0.771739	0.0144928	0.626812	0.0144928	0.59058	0.0217391	0.057971	0.0217391	0.0362319	0.15942	0.130435	0.289855	0.0253623	0	0	0.0253623	0	0	0	0	13.0435	8.33333	77.1739	1.44928	62.6812	1.44928	59.058	2.17391	5.7971	2.17391	3.62319	15.942	13.0435	28.9855	2.53623	0	0	2.53623	0	0	0	0
B	1912	MPB	306	0.124183	0.140523	0.669935	0.0653595	0.702614	0.0653595	0.637255	0	0.114379	0.0555556	0.0588235	0.0326797	0.124183	0.156863	0.0261438	0	0	0.0261438	0	0	0	0.0130719	12.4183	14.0523	66.9935	6.53595	70.2614	6.53595	63.7255	0	11.4379	5.55556	5.88235	3.26797	12.4183	15.6863	2.61438	0	0	2.61438	0	0	0	1.30719
B	1928	MPB	338	0.14497	0.118343	0.683432	0.0532544	0.56213	0.0532544	0.476331	0.0325444	0.100592	0.0710059	0.0295858	0.174556	0.136095	0.310651	0.0266272	0.00887574	0	0.0177515	0	0	0	0.00591716	14.497	11.8343	68.3432	5.32544	56.213	5.32544	47.6331	3.25444	10.0592	7.10059	2.95858	17.4556	13.6095	31.0651	2.66272	0.887574	0	1.77515	0	0	0	0.591716
B	1944	LPB	223	0	0.0358744	0.874439	0.0896861	0.798206	0.0896861	0.695067	0.0134529	0.0358744	0.0269058	0.00896861	0.165919	0	0.165919	0	0	0	0	0	0	0	0	0	3.58744	87.4439	8.96861	79.8206	8.96861	69.5067	1.34529	3.58744	2.69058	0.896861	16.5919	0	16.5919	0	0	0	0	0	0	0	0
B	1956	LPB	287	0.0174216	0.0278746	0.759582	0.195122	0.857143	0.195122	0.662021	0	0.0278746	0.0278746	0	0.097561	0.0174216	0.114983	0	0	0	0	0	0	0	0	1.74216	2.78746	75.9582	19.5122	85.7143	19.5122	66.2021	0	2.78746	2.78746	0	9.7561	1.74216	11.4983	0	0	0	0	0	0	0	0
																										0	0	0	0	0	0	0	0	0	0	0	0	0	0	0	0	0	0	0	0	0	0
	MD		total partikel	1	2	3	4	Phyclasts%/totalOM	Inertinit %/total OM	Vit total	Cut total	Sporomo all%/totalOM	Spores total	Pollen total	terr AOM/TOTALOM	mar AOM%/totalOM	AOM%/totalOM	Phytopl total	Pras total	Acr total	Dino total	Leios total	lak algae total	Foram acc	Fungi	100	200	300	400	#VALUE!	#VALUE!	#VALUE!	#VALUE!	#VALUE!	#VALUE!	#VALUE!	#VALUE!	#VALUE!	#VALUE!	#VALUE!	#VALUE!	#VALUE!	#VALUE!	#VALUE!	#VALUE!	#VALUE!	#VALUE!
C	820	UHyB	321	0.545171	0.149533	0.277259	0.0280374	0.305296	0.0280374	0.23676	0.0404984	0.0654206	0.0249221	0.0404984	0	0.420561	0.420561	0.0965732	0.0124611	0	0.0841121	0	0.11215	0	0	54.5171	14.9533	27.7259	2.80374	30.5296	2.80374	23.676	4.04984	6.54206	2.49221	4.04984	0	42.0561	42.0561	9.65732	1.24611	0	8.41121	0	11.215	0	0
C	860	UHyB	291	0.463918	0.137457	0.364261	0.0343643	0.398625	0.0343643	0.364261	0	0.106529	0.0618557	0.0446735	0	0.446735	0.446735	0.0412371	0.00343643	0	0.0309278	0.00687285	0.00687285	0	0	46.3918	13.7457	36.4261	3.43643	39.8625	3.43643	36.4261	0	10.6529	6.18557	4.46735	0	44.6735	44.6735	4.12371	0.343643	0	3.09278	0.687285	0.687285	0	0
C	960	UHyB	370	0.697297	0.132432	0.137838	0.0324324	0.17027	0.0324324	0.116216	0.0216216	0.121622	0.0783784	0.0432432	0	0.689189	0.689189	0.0189189	0	0	0.0108108	0.00810811	0	0	0	69.7297	13.2432	13.7838	3.24324	17.027	3.24324	11.6216	2.16216	12.1622	7.83784	4.32432	0	68.9189	68.9189	1.89189	0	0	1.08108	0.810811	0	0	0
C	1050	UHyB	295	0.850847	0.0169492	0.0813559	0.0508475	0.132203	0.0508475	0.0813559	0	0.0169492	0.00677966	0.0101695	0	0.847458	0.847458	0.00338983	0	0	0	0.00338983	0	0	0	85.0847	1.69492	8.13559	5.08475	13.2203	5.08475	8.13559	0	1.69492	0.677966	1.01695	0	84.7458	84.7458	0.338983	0	0	0	0.338983	0	0	0
C	1150	UHyB	288	0.649306	0.135417	0.114583	0.100694	0.215278	0.100694	0.114583	0	0.118056	0.09375	0.0243056	0	0.631944	0.631944	0.0347222	0	0	0.0173611	0.0173611	0	0	0	64.9306	13.5417	11.4583	10.0694	21.5278	10.0694	11.4583	0	11.8056	9.375	2.43056	0	63.1944	63.1944	3.47222	0	0	1.73611	1.73611	0	0	0
C	1250	UHyB	266	0.590226	0.0977444	0.281955	0.0300752	0.31203	0.0300752	0.266917	0.0150376	0.0977444	0.0526316	0.0451128	0	0.56391	0.56391	0.0225564	0	0	0	0.0225564	0.0037594	0	0	59.0226	9.77444	28.1955	3.00752	31.203	3.00752	26.6917	1.50376	9.77444	5.26316	4.51128	0	56.391	56.391	2.25564	0	0	0	2.25564	0.37594	0	0
C	1360	UHyB	337	0.632047	0.178042	0.142433	0.0474777	0.189911	0.0474777	0.136499	0.00593472	0.145401	0.0890208	0.0563798	0	0.623145	0.623145	0.041543	0.00890208	0	0.0326409	0	0	0	0	63.2047	17.8042	14.2433	4.74777	18.9911	4.74777	13.6499	0.593472	14.5401	8.90208	5.63798	0	62.3145	62.3145	4.1543	0.890208	0	3.26409	0	0	0	0
C	1420	UHyB	261	0.62069	0.256705	0.0996169	0.0229885	0.122605	0.0229885	0.0957854	0.00383142	0.149425	0.0613027	0.0881226	0	0.59387	0.59387	0.111111	0.00383142	0	0.10728	0	0.0229885	0	0	62.069	25.6705	9.96169	2.29885	12.2605	2.29885	9.57854	0.383142	14.9425	6.13027	8.81226	0	59.387	59.387	11.1111	0.383142	0	10.728	0	2.29885	0	0
C	1450	LHyB	269	0.687732	0.130112	0.0929368	0.0892193	0.182156	0.0892193	0.0929368	0	0.122677	0.063197	0.0594796	0	0.67658	0.67658	0.0185874	0.00743494	0	0.00743494	0.00371747	0	0	0	68.7732	13.0112	9.29368	8.92193	18.2156	8.92193	9.29368	0	12.2677	6.3197	5.94796	0	67.658	67.658	1.85874	0.743494	0	0.743494	0.371747	0	0	0
C	1500	LHyB	266	0.62782	0.157895	0.172932	0.0413534	0.214286	0.0413534	0.169173	0.0037594	0.109023	0.018797	0.0902256	0	0.62406	0.62406	0.0526316	0.0037594	0	0.0488722	0	0	0	0	62.782	15.7895	17.2932	4.13534	21.4286	4.13534	16.9173	0.37594	10.9023	1.8797	9.02256	0	62.406	62.406	5.26316	0.37594	0	4.88722	0	0	0	0
C	1540	LHyB	286	0.475524	0.27972	0.213287	0.0314685	0.244755	0.0314685	0.206294	0.00699301	0.164336	0.0384615	0.125874	0	0.454545	0.454545	0.136364	0.013986	0	0.115385	0.00699301	0	0	0	47.5524	27.972	21.3287	3.14685	24.4755	3.14685	20.6294	0.699301	16.4336	3.84615	12.5874	0	45.4545	45.4545	13.6364	1.3986	0	11.5385	0.699301	0	0	0
C	1560	LHyB	266	0.458647	0.308271	0.221805	0.0112782	0.233083	0.0112782	0.221805	0	0.142857	0.0676692	0.075188	0	0.451128	0.451128	0.172932	0.0075188	0	0.165414	0	0	0	0	45.8647	30.8271	22.1805	1.12782	23.3083	1.12782	22.1805	0	14.2857	6.76692	7.5188	0	45.1128	45.1128	17.2932	0.75188	0	16.5414	0	0	0	0
C	1630	LHyB	227	0.198238	0.110132	0.599119	0.092511	0.577093	0.092511	0.440529	0.0440529	0.0837004	0.0396476	0.0440529	0.114537	0.193833	0.30837	0.030837	0	0	0.0264317	0.00440529	0	0	0	19.8238	11.0132	59.9119	9.2511	57.7093	9.2511	44.0529	4.40529	8.37004	3.96476	4.40529	11.4537	19.3833	30.837	3.0837	0	0	2.64317	0.440529	0	0	0
C	1670	LHyB	287	0.45993	0.198606	0.243902	0.097561	0.296167	0.097561	0.184669	0.0139373	0.0836237	0.0452962	0.0383275	0.0452962	0.442509	0.487805	0.132404	0.0174216	0	0.114983	0	0	0	0	45.993	19.8606	24.3902	9.7561	29.6167	9.7561	18.4669	1.39373	8.36237	4.52962	3.83275	4.52962	44.2509	48.7805	13.2404	1.74216	0	11.4983	0	0	0	0
C	1710	LHyB	367	0.305177	0.185286	0.302452	0.207084	0.427793	0.207084	0.209809	0.0108992	0.0899183	0.027248	0.0626703	0.0817439	0.294278	0.376022	0.106267	0.0108992	0	0.0953678	0	0	0	0	30.5177	18.5286	30.2452	20.7084	42.7793	20.7084	20.9809	1.08992	8.99183	2.7248	6.26703	8.17439	29.4278	37.6022	10.6267	1.08992	0	9.53678	0	0	0	0
C	1750	LHyB	301	0.129568	0.126246	0.415282	0.328904	0.511628	0.328904	0.182724	0	0.126246	0.0431894	0.0830565	0.232558	0.129568	0.362126	0	0	0	0	0	0	0	0	12.9568	12.6246	41.5282	32.8904	51.1628	32.8904	18.2724	0	12.6246	4.31894	8.30565	23.2558	12.9568	36.2126	0	0	0	0	0	0	0	0
C	1785	LHyB	323	0.142415	0.210526	0.526316	0.120743	0.473684	0.120743	0.340557	0.0123839	0.185759	0.0557276	0.130031	0.173375	0.139319	0.312693	0.0278638	0.00309598	0	0.0247678	0	0	0	0	14.2415	21.0526	52.6316	12.0743	47.3684	12.0743	34.0557	1.23839	18.5759	5.57276	13.0031	17.3375	13.9319	31.2693	2.78638	0.309598	0	2.47678	0	0	0	0
C	1795	CoB	278	0.215827	0.154676	0.582734	0.0467626	0.431655	0.0467626	0.363309	0.0215827	0.147482	0.057554	0.0899281	0.197842	0.215827	0.413669	0.00719424	0	0	0.00719424	0	0	0	0	21.5827	15.4676	58.2734	4.67626	43.1655	4.67626	36.3309	2.15827	14.7482	5.7554	8.99281	19.7842	21.5827	41.3669	0.719424	0	0	0.719424	0	0	0	0
C	1810	CoB	215	0.297674	0.260465	0.348837	0.0930233	0.32093	0.0930233	0.227907	0	0.195349	0.0837209	0.111628	0.12093	0.288372	0.409302	0.0744186	0.00930233	0	0.0651163	0	0	0	0	29.7674	26.0465	34.8837	9.30233	32.093	9.30233	22.7907	0	19.5349	8.37209	11.1628	12.093	28.8372	40.9302	7.44186	0.930233	0	6.51163	0	0	0	0
C	1840	CoB	306	0.0424837	0.130719	0.761438	0.0653595	0.598039	0.0653595	0.486928	0.0457516	0.127451	0.0294118	0.0980392	0.228758	0.0326797	0.261438	0.0130719	0.00980392	0	0.00326797	0	0	0	0	4.24837	13.0719	76.1438	6.53595	59.8039	6.53595	48.6928	4.57516	12.7451	2.94118	9.80392	22.8758	3.26797	26.1438	1.30719	0.980392	0	0.326797	0	0	0	0
C	1860	CoB	255	0.2	0.207843	0.431373	0.160784	0.478431	0.160784	0.301961	0.0156863	0.188235	0.0627451	0.12549	0.113725	0.184314	0.298039	0.0352941	0	0	0.0196078	0.0156863	0	0	0	20	20.7843	43.1373	16.0784	47.8431	16.0784	30.1961	1.56863	18.8235	6.27451	12.549	11.3725	18.4314	29.8039	3.52941	0	0	1.96078	1.56863	0	0	0
C	1880	CoB	328	0.414634	0.29878	0.216463	0.070122	0.143293	0.070122	0.0731707	0	0.185976	0.097561	0.0884146	0.143293	0.414634	0.557927	0.112805	0	0	0.112805	0	0	0	0	41.4634	29.878	21.6463	7.0122	14.3293	7.0122	7.31707	0	18.5976	9.7561	8.84146	14.3293	41.4634	55.7927	11.2805	0	0	11.2805	0	0	0	0
C	1900	CoB	307	0.527687	0.257329	0.188925	0.0260586	0.0651466	0.0260586	0	0.0390879	0.188925	0.0586319	0.130293	0.149837	0.52443	0.674267	0.0716612	0.00325733	0	0.0684039	0	0	0	0	52.7687	25.7329	18.8925	2.60586	6.51466	2.60586	0	3.90879	18.8925	5.86319	13.0293	14.9837	52.443	67.4267	7.16612	0.325733	0	6.84039	0	0	0	0
C	1920	CoB	273	0.575092	0.241758	0.161172	0.021978	0.124542	0.021978	0.0952381	0.00732601	0.135531	0.10989	0.025641	0.0586081	0.553114	0.611722	0.128205	0.018315	0	0.106227	0.003663	0	0	0	57.5092	24.1758	16.1172	2.1978	12.4542	2.1978	9.52381	0.732601	13.5531	10.989	2.5641	5.86081	55.3114	61.1722	12.8205	1.8315	0	10.6227	0.3663	0	0	0
C	1945	CoB	294	0.557823	0.357143	0.0714286	0.0136054	0.0578231	0.0136054	0.037415	0.00680272	0.221088	0.105442	0.115646	0.0272109	0.55102	0.578231	0.142857	0.00340136	0	0.136054	0.00340136	0	0	0	55.7823	35.7143	7.14286	1.36054	5.78231	1.36054	3.7415	0.680272	22.1088	10.5442	11.5646	2.72109	55.102	57.8231	14.2857	0.340136	0	13.6054	0.340136	0	0	0
C	2000	CeB	258	0.589147	0.329457	0.0542636	0.0271318	0.0465116	0.0271318	0.0193798	0	0.22093	0.120155	0.100775	0.0348837	0.569767	0.604651	0.127907	0.0193798	0	0.108527	0	0	0	0	58.9147	32.9457	5.42636	2.71318	4.65116	2.71318	1.93798	0	22.093	12.0155	10.0775	3.48837	56.9767	60.4651	12.7907	1.93798	0	10.8527	0	0	0	0
C	2020	CeB	272	0.400735	0.466912	0.102941	0.0294118	0.125	0.0294118	0.0955882	0	0.1875	0.0992647	0.0882353	0.00735294	0.397059	0.404412	0.283088	0.00367647	0	0.279412	0	0	0	0	40.0735	46.6912	10.2941	2.94118	12.5	2.94118	9.55882	0	18.75	9.92647	8.82353	0.735294	39.7059	40.4412	28.3088	0.367647	0	27.9412	0	0	0	0
C	2060	CeB	312	0.455128	0.217949	0.253205	0.0737179	0.298077	0.0737179	0.205128	0.0192308	0.13141	0.0705128	0.0608974	0.0288462	0.455128	0.483974	0.0865385	0	0	0.0865385	0	0	0	0	45.5128	21.7949	25.3205	7.37179	29.8077	7.37179	20.5128	1.92308	13.141	7.05128	6.08974	2.88462	45.5128	48.3974	8.65385	0	0	8.65385	0	0	0	0
C	2260	CyM&MeB	282	0.439716	0.170213	0.343972	0.0460993	0.368794	0.0460993	0.27305	0.0496454	0.0673759	0.0425532	0.0248227	0.0212766	0.439716	0.460993	0.102837	0	0	0.102837	0	0	0	0	43.9716	17.0213	34.3972	4.60993	36.8794	4.60993	27.305	4.96454	6.73759	4.25532	2.48227	2.12766	43.9716	46.0993	10.2837	0	0	10.2837	0	0	0	0
C	2350	CyM&MeB	297	0.505051	0.185185	0.252525	0.0572391	0.282828	0.0572391	0.20202	0.023569	0.107744	0.0538721	0.0538721	0.026936	0.505051	0.531987	0.0774411	0	0	0.0774411	0	0	0	0	50.5051	18.5185	25.2525	5.72391	28.2828	5.72391	20.202	2.3569	10.7744	5.38721	5.38721	2.6936	50.5051	53.1987	7.74411	0	0	7.74411	0	0	0	0
C	2430	CyM&MeB	257	0.392996	0.0972763	0.420233	0.0894942	0.470817	0.0894942	0.381323	0	0.0856031	0.0155642	0.0700389	0.0389105	0.377432	0.416342	0.0272374	0.0116732	0	0.0116732	0.00389105	0	0	0	39.2996	9.72763	42.0233	8.94942	47.0817	8.94942	38.1323	0	8.56031	1.55642	7.00389	3.89105	37.7432	41.6342	2.72374	1.16732	0	1.16732	0.389105	0	0	0
C	2440	RpC	282	0.556738	0.0780142	0.304965	0.0602837	0.365248	0.0602837	0.301418	0.0035461	0.070922	0.0212766	0.0496454	0	0.553191	0.553191	0.0106383	0.0035461	0	0.0070922	0	0	0	0	55.6738	7.80142	30.4965	6.02837	36.5248	6.02837	30.1418	0.35461	7.0922	2.12766	4.96454	0	55.3191	55.3191	1.06383	0.35461	0	0.70922	0	0	0	0
C	2455	RpC	309	0.106796	0.100324	0.763754	0.0291262	0.346278	0.0291262	0.291262	0.02589	0.0647249	0.0582524	0.00647249	0.446602	0.106796	0.553398	0.0355987	0	0	0.0355987	0	0	0	0	10.6796	10.0324	76.3754	2.91262	34.6278	2.91262	29.1262	2.589	6.47249	5.82524	0.647249	44.6602	10.6796	55.3398	3.55987	0	0	3.55987	0	0	0	0
C	2465	RpC	263	0.330798	0.136882	0.513308	0.0190114	0.243346	0.0190114	0.224335	0	0.129278	0.0722433	0.0570342	0.288973	0.330798	0.619772	0.00760456	0	0	0.00760456	0	0	0	0	33.0798	13.6882	51.3308	1.90114	24.3346	1.90114	22.4335	0	12.9278	7.22433	5.70342	28.8973	33.0798	61.9772	0.760456	0	0	0.760456	0	0	0	0
C	2480	RpC	283	0.526502	0.113074	0.360424	0	0.14841	0	0.14841	0	0.0918728	0.0918728	0	0.212014	0.526502	0.738516	0.0212014	0	0	0.0212014	0	0	0	0	52.6502	11.3074	36.0424	0	14.841	0	14.841	0	9.18728	9.18728	0	21.2014	52.6502	73.8516	2.12014	0	0	2.12014	0	0	0	0
C	2490	RpC	362	0.325967	0.0359116	0.627072	0.0110497	0.104972	0.0110497	0.0856354	0.00828729	0.0220994	0.0220994	0	0.533149	0.320442	0.853591	0.019337	0.00552486	0	0.0138122	0	0	0	0	32.5967	3.59116	62.7072	1.10497	10.4972	1.10497	8.56354	0.828729	2.20994	2.20994	0	53.3149	32.0442	85.3591	1.9337	0.552486	0	1.38122	0	0	0	0
C	2499	RpC	269	0.513011	0.126394	0.349442	0.0111524	0.252788	0.0111524	0.230483	0.0111524	0.0743494	0.0408922	0.0334572	0.107807	0.513011	0.620818	0.0520446	0	0	0.0520446	0	0	0	0	51.3011	12.6394	34.9442	1.11524	25.2788	1.11524	23.0483	1.11524	7.43494	4.08922	3.34572	10.7807	51.3011	62.0818	5.20446	0	0	5.20446	0	0	0	0
C	2584	MPB	283	0.162544	0.183746	0.530035	0.123675	0.448763	0.123675	0.310954	0.0141343	0.0176678	0.0106007	0.00706714	0.204947	0.144876	0.349823	0.183746	0.0176678	0	0.166078	0	0	0	0	16.2544	18.3746	53.0035	12.3675	44.8763	12.3675	31.0954	1.41343	1.76678	1.06007	0.706714	20.4947	14.4876	34.9823	18.3746	1.76678	0	16.6078	0	0	0	0
C	2588	MPB	223	0.0224215	0.112108	0.663677	0.201794	0.856502	0.201794	0.55157	0.103139	0.0538117	0.0403587	0.0134529	0.00896861	0.0134529	0.0224215	0.058296	0	0	0.058296	0	0.00896861	0	0	2.24215	11.2108	66.3677	20.1794	85.6502	20.1794	55.157	10.3139	5.38117	4.03587	1.34529	0.896861	1.34529	2.24215	5.8296	0	0	5.8296	0	0.896861	0	0
C	2592	MPB	335	0.0537313	0.423881	0.516418	0.00597015	0.340299	0.00597015	0.334328	0	0.038806	0.0298507	0.00895522	0.18209	0.0149254	0.197015	0.408955	0.00597015	0	0.385075	0.0179104	0.0149254	0	0	5.37313	42.3881	51.6418	0.597015	34.0299	0.597015	33.4328	0	3.8806	2.98507	0.895522	18.209	1.49254	19.7015	40.8955	0.597015	0	38.5075	1.79104	1.49254	0	0
C	2644	LPB	294	0.146259	0.122449	0.639456	0.0918367	0.731293	0.0918367	0.5	0.139456	0.085034	0.0306122	0.0544218	0	0.146259	0.146259	0.037415	0	0	0.037415	0	0	0	0	14.6259	12.2449	63.9456	9.18367	73.1293	9.18367	50	13.9456	8.5034	3.06122	5.44218	0	14.6259	14.6259	3.7415	0	0	3.7415	0	0	0	0
C	2652	LPB	509	0.408644	0.102161	0.438114	0.0510806	0.430255	0.0510806	0.379175	0	0.0844794	0.0373281	0.0471513	0.0589391	0.333988	0.392927	0.0294695	0.0117878	0	0.0176817	0	0.0628684	0	0	40.8644	10.2161	43.8114	5.10806	43.0255	5.10806	37.9175	0	8.44794	3.73281	4.71513	5.89391	33.3988	39.2927	2.94695	1.17878	0	1.76817	0	6.28684	0	0
C	2676	LPB	326	0	0	1	0	0.935583	0	0.935583	0	0	0	0	0.0644172	0	0.0644172	0	0	0	0	0	0	0	0	0	0	100	0	93.5583	0	93.5583	0	0	0	0	6.44172	0	6.44172	0	0	0	0	0	0	0	0
C	2680	LPB	261	0	0	0.988506	0.0114943	0.969349	0.0114943	0.957854	0	0	0	0	0.0306513	0	0.0306513	0	0	0	0	0	0	0	0	0	0	98.8506	1.14943	96.9349	1.14943	95.7854	0	0	0	0	3.06513	0	3.06513	0	0	0	0	0	0	0	0
C	2684	LPB	234	0	0	0.978632	0.0213675	0.952991	0.0213675	0.931624	0	0	0	0	0.0470085	0	0.0470085	0	0	0	0	0	0	0	0	0	0	97.8632	2.13675	95.2991	2.13675	93.1624	0	0	0	0	4.70085	0	4.70085	0	0	0	0	0	0	0	0
C	2688	LPB	310	0.016129	0.00322581	0.906452	0.0741935	0.851613	0.0741935	0.751613	0.0258065	0.00322581	0.00322581	0	0.129032	0.016129	0.145161	0	0	0	0	0	0	0	0	1.6129	0.322581	90.6452	7.41935	85.1613	7.41935	75.1613	2.58065	0.322581	0.322581	0	12.9032	1.6129	14.5161	0	0	0	0	0	0	0	0
C	2692	LPB	322	0	0.0124224	0.968944	0.0186335	0.956522	0.0186335	0.900621	0.0372671	0.0124224	0	0.0124224	0.0310559	0	0.0310559	0	0	0	0	0	0	0	0	0	1.24224	96.8944	1.86335	95.6522	1.86335	90.0621	3.72671	1.24224	0	1.24224	3.10559	0	3.10559	0	0	0	0	0	0	0	0
C	2696	LPB	371	0	0	0.876	0.124	1	0.124	0.876	0	0	0	0	0	0	0	0	0	0	0	0	0	0	0	0	0	87.6	12.4	100	12.4	87.6	0	0	0	0	0	0	0	0	0	0	0	0	0	0	0

## Sheet: Sheet4
	Palynofacies Analysis & Optical Kerogen Analysis
	Well	Depth below top Cenozoic (m TVD)	Formation	# particles	Phyclasts %	Inertinit %	Vitrinite %	Cutinite %	Sporomo %	Spores %	Pollen %	terrestrial AOM %	marine AOM %	AOM %	Phyto-plancton %	Prasino-phytes %	Acritarcs %	Dinocysts %	Leiospheres %	Freshwater algae %	Foramini-feres %	Fungi %		Kerogen Types Type I Type II Type III Type IV
	A	45	UHy	250	15.6	4.8	10	0.8	12.8	9.6	3.2	0	64.8	64.8	6.4	0.4	0	2.8	3.2	0.4	0	0		68.8	15.6	10.8	4.8
	A	104	UHy	222	14.8649	4.95495	9.90991	0	7.65766	4.5045	3.15315	0	74.3243	74.3243	3.15315	0.900901	0	0.45045	1.8018	0	0	0		77.027	8.10811	9.90991	4.95495
	A	180	UHy	280	27.1429	7.5	19.6429	0	22.8571	15.3571	7.5	0	41.0714	41.0714	8.92857	0.357143	0	5	3.57143	0	0	0		45	27.8571	19.6429	7.5
	A	269	UHy	337	31.1573	8.30861	20.7715	2.07715	14.8368	4.74777	10.089	0	43.0267	43.0267	10.9792	0.890208	0	7.71513	2.37389	0	0	0		46.2908	22.5519	22.8487	8.30861
	A	342	UHy	392	34.4388	7.90816	23.7245	2.80612	10.2041	4.33673	5.86735	0	45.1531	45.1531	10.2041	0.765306	0	8.67347	0.765306	0	0	0		46.6837	18.8776	26.5306	7.90816
	A	365	UHy	319	24.1379	5.95611	18.1818	0	15.047	4.07524	10.9718	0	43.8871	43.8871	16.9279	1.25392	0	15.674	0	0	0	0		45.1411	30.721	18.1818	5.95611
	A	372	UHy	354	19.4915	3.38983	16.1017	0	18.6441	8.47458	10.1695	0	40.3955	40.3955	20.6215	0	0	19.4915	1.12994	0.847458	0	0		42.3729	38.1356	16.1017	3.38983
	A	419	UHy	319	24.1379	5.95611	18.1818	0	15.047	4.07524	10.9718	0	43.8871	43.8871	16.9279	1.25392	0	15.674	0	0	0	0		45.1411	30.721	18.1818	5.95611
	A	440	UHy	274	20.073	5.83942	14.2336	0	22.6277	6.56934	16.0584	0	45.9854	45.9854	7.29927	0	0	6.20438	1.09489	4.0146	0	0		51.0949	28.8321	14.2336	5.83942
	A	455	UHy	281	20.6406	5.69395	14.9466	0	19.9288	10.6762	9.25267	0	40.5694	40.5694	18.8612	5.33808	0	11.032	2.4911	0	0	0		48.3986	30.9609	14.9466	5.69395
	A	476	UHy	290	22.4138	6.89655	12.4138	3.10345	28.2759	6.89655	21.3793	0	41.3793	41.3793	7.93103	1.37931	0	4.13793	2.41379	0	0	0		45.1724	32.4138	15.5172	6.89655
	A	485	UHy	330	11.5152	2.42424	8.18182	0.909091	19.0909	7.57576	11.5152	0	24.8485	24.8485	44.5455	0	0	42.4242	2.12121	0	0	0		26.9697	61.5152	9.09091	2.42424
	A	509	LHy	277	24.1877	5.41516	14.8014	3.97112	19.4946	5.41516	14.0794	0	38.2671	38.2671	18.0505	0.722022	0	13.3574	3.97112	0	0	0		42.9603	32.852	18.7726	5.41516
	A	516	LHy	277	30.6859	2.52708	27.4368	0.722022	23.8267	5.05415	18.7726	3.61011	32.852	36.4621	9.02527	1.80505	0	7.22022	0	0	0	0		34.657	31.0469	31.769	2.52708
	A	527	LHy	303	20.462	6.60066	12.5413	1.32013	16.8317	5.94059	10.8911	0	47.8548	47.8548	14.5215	2.31023	0	9.24092	2.9703	0.330033	0	0		53.4653	26.0726	13.8614	6.60066
	A	535	LHy	331	22.6586	6.34441	13.5952	2.71903	24.4713	3.62538	20.8459	0	36.858	36.858	16.0121	1.20846	0	12.0846	2.71903	0	0	0		40.7855	36.5559	16.3142	6.34441
	A	554	LHy	361	30.7479	6.37119	24.3767	0	19.9446	3.60111	16.3435	0	35.1801	35.1801	13.5734	2.49307	0	11.0803	0	0.554017	0	0		38.2271	31.0249	24.3767	6.37119
	A	561	LHy	341	22.8739	5.8651	14.6628	2.34604	18.4751	7.03812	11.437	0	34.8974	34.8974	23.7537	0	0	23.1672	0.58651	0	0	0		35.4839	41.6422	17.0088	5.8651
	A	568	LHy	261	19.9234	13.41	4.98084	1.53257	12.6437	4.98084	7.66284	0	27.2031	27.2031	40.2299	0	0	38.6973	1.53257	0	0	0		28.7356	51.341	6.51341	13.41
	A	575	LHy	313	11.1821	6.38978	4.79233	0	27.1565	16.9329	10.2236	1.59744	37.0607	38.6581	20.1278	0.638978	0	18.5304	0.958466	2.8754	0	0		41.5335	45.6869	6.38978	6.38978
	A	636	Cer	329	24.3161	10.3343	13.9818	0	21.8845	2.73556	19.1489	8.20669	36.1702	44.3769	9.11854	0.911854	0	8.20669	0	0.303951	0	0		37.386	30.0912	22.1884	10.3343
	A	769	CyM& ME	540	90.5556	14.4444	40.3704	35.7407	3.14815	1.48148	1.66667	4.62963	0	4.62963	1.66667	0	0	1.66667	0	0	0	0		0	4.81481	80.7407	14.4444
	A	803	CyM& ME	333	29.1291	12.6126	15.3153	1.2012	20.1201	8.70871	11.4114	0	46.5465	46.5465	3.9039	0	0	3.9039	0	0.3003	0	0		46.8468	24.024	16.5165	12.6126
	A	885	CyM& ME	284	84.507	19.0141	63.3803	2.11268	3.52113	3.52113	0	4.22535	0	4.22535	7.74648	0.352113	0	7.39437	0	0	0	0		0.352113	10.9155	69.7183	19.0141
	A	925	RpC	348	79.3103	15.5172	59.7701	4.02299	8.62069	4.02299	4.5977	4.31034	0	4.31034	7.75862	0.862069	0	6.89655	0	0	0	0		0.862069	15.5172	68.1034	15.5172
	A	935	RpC	386	80.5699	6.99482	68.9119	4.66321	7.25389	0.777202	6.47668	7.77202	0	7.77202	4.40415	0	0	2.33161	2.07254	0	0	0		2.07254	9.58549	81.3472	6.99482
	A	945	RpC	356	72.191	3.93258	64.8876	3.37079	5.33708	3.37079	1.96629	12.6404	0	12.6404	9.83146	0.842697	0	8.98876	0	0	0	0		0.842697	14.3258	80.8989	3.93258
	A	952	RpC	288	81.9444	9.02778	70.8333	2.08333	2.08333	2.08333	0	15.2778	0	15.2778	0.694444	0	0	0.694444	0	0	0	0		0	2.77778	88.1944	9.02778
	A	964	RpC	357	72.8291	8.12325	61.3445	3.36134	5.32213	3.92157	1.40056	14.2857	0	14.2857	7.56303	0	0	7.56303	0	0	0	0		0	12.8852	78.9916	8.12325
	A	970	RpC	266	70.6767	3.00752	66.1654	1.50376	3.7594	2.25564	1.50376	22.5564	0	22.5564	2.25564	0.75188	0	1.50376	0	0.75188	0	0		1.50376	5.26316	90.2256	3.00752
	A	983	PE	274	79.1971	9.12409	70.073	0	7.29927	6.20438	1.09489	7.29927	1.09489	8.39416	2.91971	0	0	2.18978	0.729927	2.18978	0	0		4.0146	9.48905	77.3723	9.12409
	A	990	PE	224	75	4.46429	67.4107	3.125	1.78571	1.78571	0	12.5	2.23214	14.7321	8.48214	0	0	8.48214	0	0	0	0		2.23214	10.2679	83.0357	4.46429
	A	1001	PE	259	81.4672	14.6718	66.7954	0	6.17761	2.3166	3.861	3.0888	6.17761	9.26641	3.0888	0.772201	0	2.3166	0	0	0	0		6.94981	8.49421	69.8842	14.6718
	A	1006	PE	264	80.303	10.6061	69.697	0	1.51515	0	1.51515	4.92424	4.92424	9.84848	8.33333	1.89394	0	4.92424	1.51515	0	0	0		8.33333	6.43939	74.6212	10.6061
	A	1008	PE	235	90.2128	16.5957	73.617	0	4.25532	3.40426	0.851064	2.12766	2.97872	5.10638	0.425532	0	0	0.425532	0	0	0	0		2.97872	4.68085	75.7447	16.5957
	A	1011	PE	331	66.1631	12.3867	50.7553	3.02115	7.55287	5.74018	1.81269	1.51057	13.5952	15.1057	11.1782	0	0	11.1782	0	0	0	0		13.5952	18.7311	55.287	12.3867
	A	1013	PE	281	79.7153	16.3701	63.3452	0	8.54093	4.62633	3.91459	5.33808	2.84698	8.18505	3.55872	0	0	3.55872	0	0	0	0		2.84698	12.0996	68.6833	16.3701
	A	1015	PE	238	61.7647	16.8067	43.6975	1.2605	11.3445	6.30252	5.04202	3.36134	18.9076	22.2689	4.62185	0.840336	0	3.78151	0	0	0	0		19.7479	15.1261	48.3193	16.8067
	A	1020	PE	310	69.0323	19.0323	47.4194	2.58065	9.67742	4.83871	4.83871	12.9032	5.80645	18.7097	2.58065	0.645161	0	1.6129	0.322581	0	0	0		6.77419	11.2903	62.9032	19.0323
	Well	Depth below top Cenozoic (m TVD)	Formation	# particles	Phyclasts %	Inertinit %	Vitrinite %	Cutinite %	Sporomo %	Spores %	Pollen %	terrestrial AOM %	marine AOM %	AOM %	Phyto-plancton %	Prasino-phytes %	Acritarcs %	Dinocysts %	Leiospheres %	Freshwater algae %	Foramini-feres %	Fungi %		Kerogen Types Type I Type II Type III Type IV
	B	10	UHy	319	40.7524	5.64263	33.5423	1.5674	11.2853	5.01567	6.26959	1.5674	45.4545	47.0219	0.940439	0.626959	0	0.31348	0	0	0	0		46.0815	11.5987	36.6771	5.64263
	B	105	UHy	303	31.3531	6.60066	24.7525	0	14.8515	7.59076	7.26073	3.30033	47.8548	51.1551	2.64026	0.990099	0	0	1.65017	0	0	0		50.495	14.8515	28.0528	6.60066
	B	200	UHy	318	16.9811	2.83019	11.3208	2.83019	11.6352	8.80503	2.83019	0	59.7484	59.7484	11.6352	3.45912	0	5.34591	2.83019	0	0	0		66.0377	16.9811	14.1509	2.83019
	B	305	UHy	316	1.89873	0	1.89873	0	29.4304	11.3924	18.038	0	61.7089	61.7089	6.96203	3.48101	0	1.26582	2.21519	0	0	0		67.4051	30.6962	1.89873	0
	B	400	UHy	288	4.51389	1.38889	2.77778	0.347222	15.9722	6.25	9.72222	0	46.875	46.875	32.6389	5.20833	0	27.4306	0	0	0	0		52.0833	43.4028	3.125	1.38889
	B	450	UHy	372	22.5806	3.76344	15.8602	2.95699	25	12.6344	12.3656	0	48.3871	48.3871	3.49462	0.806452	0	2.15054	0.537634	0.537634	0	0		50.2688	27.1505	18.8172	3.76344
	B	475	UHy	383	32.6371	5.48303	26.1097	1.04439	17.4935	8.61619	8.87728	0	43.6031	43.6031	6.26632	0	0	6.26632	0	0	0	0		43.6031	23.7598	27.154	5.48303
	B	495	UHy	276	15.942	3.98551	8.69565	3.26087	16.3043	9.05797	7.24638	0	54.7101	54.7101	13.0435	0	0	13.0435	0	0	0	0		54.7101	29.3478	11.9565	3.98551
	B	510	UHy	269	14.4981	3.71747	10.7807	0	24.9071	14.8699	10.0372	0	56.1338	56.1338	4.46097	0	0	4.46097	0	0	0	0		56.1338	29.368	10.7807	3.71747
	B	525	LHy	269	7.80669	1.11524	6.69145	0	21.9331	9.66543	12.2677	0	59.1078	59.1078	11.1524	1.11524	0	9.29368	0.743494	0	0	0		60.9665	31.2268	6.69145	1.11524
	B	545	LHy	250	8	0	8	0	14.8	7.6	7.2	0	61.2	61.2	15.6	3.6	0	10.8	1.2	0.4	0	0		66.4	25.6	8	0
	B	565	LHy	287	15.6794	2.09059	13.5889	0	27.1777	6.62021	20.5575	0	40.4181	40.4181	14.2857	3.13589	0	9.7561	1.39373	2.43902	0	0		47.3868	36.9338	13.5889	2.09059
	B	575	LHy	307	23.4528	7.81759	14.3322	1.30293	18.5668	5.21173	13.355	0	43.3225	43.3225	13.355	0.325733	0	10.7492	2.28013	1.30293	0	0		47.2313	29.316	15.6352	7.81759
	B	605	LHy	300	13	4.66667	7	1.33333	23	5.66667	17.3333	0	41.3333	41.3333	21.3333	2.66667	0	17	1.66667	1.33333	0	2.33333		47	40	8.33333	4.66667
	B	635	LHy	325	22.1538	2.46154	18.7692	0.923077	18.7692	8.92308	9.84615	0	41.8462	41.8462	14.1538	1.23077	0	11.6923	1.23077	3.07692	0	0		47.3846	30.4615	19.6923	2.46154
	B	665	LHy	332	37.0482	10.5422	25.3012	1.20482	26.8072	5.72289	21.0843	0.903614	21.988	22.8916	13.253	0.60241	0	12.6506	0	0	0	0		22.5904	39.4578	27.4096	10.5422
	B	705	LHy	291	35.0515	8.24742	25.4296	1.37457	23.7113	4.811	18.9003	0	35.0515	35.0515	3.78007	0	0	3.78007	0	2.4055	0	0		37.457	27.4914	26.8041	8.24742
	B	725	LHy	255	21.1765	5.88235	13.3333	1.96078	9.80392	2.35294	7.45098	0	47.451	47.451	21.5686	3.92157	0	17.6471	0	0	0	1.96078		51.3725	27.451	15.2941	5.88235
	B	760	LHy	284	35.2113	5.98592	29.2254	0	18.662	4.22535	14.4366	0	35.5634	35.5634	10.5634	1.76056	0	8.80282	0	0	0	0		37.3239	27.4648	29.2254	5.98592
	B	780	LHy	297	42.7609	10.101	29.9663	2.6936	20.202	3.0303	17.1717	0	31.3131	31.3131	5.72391	1.3468	0	4.3771	0	0	0	0		32.6599	24.5791	32.6599	10.101
	B	795	LHy	334	41.018	8.98204	32.0359	0	24.2515	5.08982	19.1617	0	26.9461	26.9461	7.78443	0.898204	0	4.79042	2.09581	0	0	0		29.9401	29.0419	32.0359	8.98204
	B	820	CyM	374	48.3957	12.2995	34.492	1.60428	16.8449	5.61497	11.2299	0	32.0856	32.0856	2.6738	0.534759	0	0.534759	1.60428	0	0	0		34.2246	17.3797	36.0963	12.2995
	B	865	CyM & ME	350	32	6	26	0	20.2857	7.42857	12.8571	0	43.4286	43.4286	4.28571	0.571429	0	3.71429	0	0	0	0.571429		44	24	26	6
	B	975	RpC	343	55.102	8.74636	40.5248	5.8309	14.2857	2.91545	11.3703	0	20.6997	20.6997	8.16327	0	0	6.99708	1.16618	1.74927	0	0		23.6152	21.2828	46.3557	8.74636
	B	985	RpC	291	83.1615	12.3711	67.6976	3.09278	4.811	1.71821	3.09278	0	9.62199	9.62199	2.4055	0	0	2.4055	0	0	0	0		9.62199	7.21649	70.7904	12.3711
	B	995	RpC	304	67.4342	4.93421	62.5	0	11.5132	2.30263	9.21053	1.64474	14.1447	15.7895	5.26316	0.328947	0	4.60526	0.328947	0	0	0		14.8026	16.1184	64.1447	4.93421
	B	1005	RpC	337	69.4362	8.60534	56.3798	4.45104	6.23145	0.890208	5.34125	11.5727	7.12166	18.6944	3.26409	0	0	3.26409	0	2.37389	0	0		9.49555	9.49555	72.4036	8.60534
	B	1040	RpC	285	50.5263	4.21053	45.2632	1.05263	7.36842	4.5614	2.80702	0	37.193	37.193	4.91228	0	0	4.91228	0	0	0	0		37.193	12.2807	46.3158	4.21053
	B	1042	RpC	292	53.0822	3.08219	50	0	14.0411	3.76712	10.274	0	32.8767	32.8767	0	0	0	0	0	0	0	1.0274		32.8767	14.0411	50	3.08219
	B	1052	UPE	276	62.6812	1.44928	59.058	2.17391	5.7971	2.17391	3.62319	15.942	13.0435	28.9855	2.53623	0	0	2.53623	0	0	0	0		13.0435	8.33333	77.1739	1.44928
	B	1072	MPE	306	70.2614	6.53595	63.7255	0	11.4379	5.55556	5.88235	3.26797	12.4183	15.6863	2.61438	0	0	2.61438	0	0	0	1.30719		12.4183	14.0523	66.9935	6.53595
	B	1088	MPE	338	56.213	5.32544	47.6331	3.25444	10.0592	7.10059	2.95858	17.4556	13.6095	31.0651	2.66272	0.887574	0	1.77515	0	0	0	0.591716		14.497	11.8343	68.3432	5.32544
	B	1104	LPE	223	79.8206	8.96861	69.5067	1.34529	3.58744	2.69058	0.896861	16.5919	0	16.5919	0	0	0	0	0	0	0	0		0	3.58744	87.4439	8.96861
	B	1116	LPE	287	85.7143	19.5122	66.2021	0	2.78746	2.78746	0	9.7561	1.74216	11.4983	0	0	0	0	0	0	0	0		1.74216	2.78746	75.9582	19.5122
	Well	Depth below top Cenozoic (m TVD)	Formation	# particles	Phyclasts %	Inertinit %	Vitrinite %	Cutinite %	Sporomo %	Spores %	Pollen %	terrestrial AOM %	marine AOM %	AOM %	Phyto-plancton %	Prasino-phytes %	Acritarcs %	Dinocysts %	Leiospheres %	Freshwater algae %	Foramini-feres %	Fungi %		Kerogen Types Type I Type II Type III Type IV
	C	20	UHy	321	30.5296	2.80374	23.676	4.04984	6.54206	2.49221	4.04984	0	42.0561	42.0561	9.65732	1.24611	0	8.41121	0	11.215	0	0		54.5171	14.9533	27.7259	2.80374
	C	55	UHy	291	39.8625	3.43643	36.4261	0	10.6529	6.18557	4.46735	0	44.6735	44.6735	4.12371	0.343643	0	3.09278	0.687285	0.687285	0	0		46.3918	13.7457	36.4261	3.43643
	C	135	UHy	370	17.027	3.24324	11.6216	2.16216	12.1622	7.83784	4.32432	0	68.9189	68.9189	1.89189	0	0	1.08108	0.810811	0	0	0		69.7297	13.2432	13.7838	3.24324
	C	213	UHy	295	13.2203	5.08475	8.13559	0	1.69492	0.677966	1.01695	0	84.7458	84.7458	0.338983	0	0	0	0.338983	0	0	0		85.0847	1.69492	8.13559	5.08475
	C	289	UHy	288	21.5278	10.0694	11.4583	0	11.8056	9.375	2.43056	0	63.1944	63.1944	3.47222	0	0	1.73611	1.73611	0	0	0		64.9306	13.5417	11.4583	10.0694
	C	370	UHy	266	31.203	3.00752	26.6917	1.50376	9.77444	5.26316	4.51128	0	56.391	56.391	2.25564	0	0	0	2.25564	0.37594	0	0		59.0226	9.77444	28.1955	3.00752
	C	450	UHy	337	18.9911	4.74777	13.6499	0.593472	14.5401	8.90208	5.63798	0	62.3145	62.3145	4.1543	0.890208	0	3.26409	0	0	0	0		63.2047	17.8042	14.2433	4.74777
	C	508	UHy	261	12.2605	2.29885	9.57854	0.383142	14.9425	6.13027	8.81226	0	59.387	59.387	11.1111	0.383142	0	10.728	0	2.29885	0	0		62.069	25.6705	9.96169	2.29885
	C	532	LHy	269	18.2156	8.92193	9.29368	0	12.2677	6.3197	5.94796	0	67.658	67.658	1.85874	0.743494	0	0.743494	0.371747	0	0	0		68.7732	13.0112	9.29368	8.92193
	C	570	LHy	266	21.4286	4.13534	16.9173	0.37594	10.9023	1.8797	9.02256	0	62.406	62.406	5.26316	0.37594	0	4.88722	0	0	0	0		62.782	15.7895	17.2932	4.13534
	C	600	LHy	286	24.4755	3.14685	20.6294	0.699301	16.4336	3.84615	12.5874	0	45.4545	45.4545	13.6364	1.3986	0	11.5385	0.699301	0	0	0		47.5524	27.972	21.3287	3.14685
	C	620	LHy	266	23.3083	1.12782	22.1805	0	14.2857	6.76692	7.5188	0	45.1128	45.1128	17.2932	0.75188	0	16.5414	0	0	0	0		45.8647	30.8271	22.1805	1.12782
	C	675	LHy	227	57.7093	9.2511	44.0529	4.40529	8.37004	3.96476	4.40529	11.4537	19.3833	30.837	3.0837	0	0	2.64317	0.440529	0	0	0		19.8238	11.0132	59.9119	9.2511
	C	705	LHy	287	29.6167	9.7561	18.4669	1.39373	8.36237	4.52962	3.83275	4.52962	44.2509	48.7805	13.2404	1.74216	0	11.4983	0	0	0	0		45.993	19.8606	24.3902	9.7561
	C	740	LHy	367	42.7793	20.7084	20.9809	1.08992	8.99183	2.7248	6.26703	8.17439	29.4278	37.6022	10.6267	1.08992	0	9.53678	0	0	0	0		30.5177	18.5286	30.2452	20.7084
	C	770	LHy	301	51.1628	32.8904	18.2724	0	12.6246	4.31894	8.30565	23.2558	12.9568	36.2126	0	0	0	0	0	0	0	0		12.9568	12.6246	41.5282	32.8904
	C	800	LHy	323	47.3684	12.0743	34.0557	1.23839	18.5759	5.57276	13.0031	17.3375	13.9319	31.2693	2.78638	0.309598	0	2.47678	0	0	0	0		14.2415	21.0526	52.6316	12.0743
	C	810	Cor	278	43.1655	4.67626	36.3309	2.15827	14.7482	5.7554	8.99281	19.7842	21.5827	41.3669	0.719424	0	0	0.719424	0	0	0	0		21.5827	15.4676	58.2734	4.67626
	C	825	Cor	215	32.093	9.30233	22.7907	0	19.5349	8.37209	11.1628	12.093	28.8372	40.9302	7.44186	0.930233	0	6.51163	0	0	0	0		29.7674	26.0465	34.8837	9.30233
	C	845	Cor	306	59.8039	6.53595	48.6928	4.57516	12.7451	2.94118	9.80392	22.8758	3.26797	26.1438	1.30719	0.980392	0	0.326797	0	0	0	0		4.24837	13.0719	76.1438	6.53595
	C	858	Cor	255	47.8431	16.0784	30.1961	1.56863	18.8235	6.27451	12.549	11.3725	18.4314	29.8039	3.52941	0	0	1.96078	1.56863	0	0	0		20	20.7843	43.1373	16.0784
	C	880	Cor	328	14.3293	7.0122	7.31707	0	18.5976	9.7561	8.84146	14.3293	41.4634	55.7927	11.2805	0	0	11.2805	0	0	0	0		41.4634	29.878	21.6463	7.0122
	C	895	Cor	307	6.51466	2.60586	0	3.90879	18.8925	5.86319	13.0293	14.9837	52.443	67.4267	7.16612	0.325733	0	6.84039	0	0	0	0		52.7687	25.7329	18.8925	2.60586
	C	912	Cor	273	12.4542	2.1978	9.52381	0.732601	13.5531	10.989	2.5641	5.86081	55.3114	61.1722	12.8205	1.8315	0	10.6227	0.3663	0	0	0		57.5092	24.1758	16.1172	2.1978
	C	930	Cor	294	5.78231	1.36054	3.7415	0.680272	22.1088	10.5442	11.5646	2.72109	55.102	57.8231	14.2857	0.340136	0	13.6054	0.340136	0	0	0		55.7823	35.7143	7.14286	1.36054
	C	975	Cer	258	4.65116	2.71318	1.93798	0	22.093	12.0155	10.0775	3.48837	56.9767	60.4651	12.7907	1.93798	0	10.8527	0	0	0	0		58.9147	32.9457	5.42636	2.71318
	C	995	Cer	272	12.5	2.94118	9.55882	0	18.75	9.92647	8.82353	0.735294	39.7059	40.4412	28.3088	0.367647	0	27.9412	0	0	0	0		40.0735	46.6912	10.2941	2.94118
	C	1030	Cer	312	29.8077	7.37179	20.5128	1.92308	13.141	7.05128	6.08974	2.88462	45.5128	48.3974	8.65385	0	0	8.65385	0	0	0	0		45.5128	21.7949	25.3205	7.37179
	C	1195	CyM&ME	282	36.8794	4.60993	27.305	4.96454	6.73759	4.25532	2.48227	2.12766	43.9716	46.0993	10.2837	0	0	10.2837	0	0	0	0		43.9716	17.0213	34.3972	4.60993
	C	1275	CyM&ME	297	28.2828	5.72391	20.202	2.3569	10.7744	5.38721	5.38721	2.6936	50.5051	53.1987	7.74411	0	0	7.74411	0	0	0	0		50.5051	18.5185	25.2525	5.72391
	C	1330	CyM&ME	257	47.0817	8.94942	38.1323	0	8.56031	1.55642	7.00389	3.89105	37.7432	41.6342	2.72374	1.16732	0	1.16732	0.389105	0	0	0		39.2996	9.72763	42.0233	8.94942
	C	1360	RpC	282	36.5248	6.02837	30.1418	0.35461	7.0922	2.12766	4.96454	0	55.3191	55.3191	1.06383	0.35461	0	0.70922	0	0	0	0		55.6738	7.80142	30.4965	6.02837
	C	1375	RpC	309	34.6278	2.91262	29.1262	2.589	6.47249	5.82524	0.647249	44.6602	10.6796	55.3398	3.55987	0	0	3.55987	0	0	0	0		10.6796	10.0324	76.3754	2.91262
	C	1385	RpC	263	24.3346	1.90114	22.4335	0	12.9278	7.22433	5.70342	28.8973	33.0798	61.9772	0.760456	0	0	0.760456	0	0	0	0		33.0798	13.6882	51.3308	1.90114
	C	1395	RpC	283	14.841	0	14.841	0	9.18728	9.18728	0	21.2014	52.6502	73.8516	2.12014	0	0	2.12014	0	0	0	0		52.6502	11.3074	36.0424	0
	C	1410	RpC	362	10.4972	1.10497	8.56354	0.828729	2.20994	2.20994	0	53.3149	32.0442	85.3591	1.9337	0.552486	0	1.38122	0	0	0	0		32.5967	3.59116	62.7072	1.10497
	C	1420	RpC	269	25.2788	1.11524	23.0483	1.11524	7.43494	4.08922	3.34572	10.7807	51.3011	62.0818	5.20446	0	0	5.20446	0	0	0	0		51.3011	12.6394	34.9442	1.11524
	C	1485	MPE	283	44.8763	12.3675	31.0954	1.41343	1.76678	1.06007	0.706714	20.4947	14.4876	34.9823	18.3746	1.76678	0	16.6078	0	0	0	0		16.2544	18.3746	53.0035	12.3675
	C	1495	MPE	223	85.6502	20.1794	55.157	10.3139	5.38117	4.03587	1.34529	0.896861	1.34529	2.24215	5.8296	0	0	5.8296	0	0.896861	0	0		2.24215	11.2108	66.3677	20.1794
	C	1510	MPE	335	34.0299	0.597015	33.4328	0	3.8806	2.98507	0.895522	18.209	1.49254	19.7015	40.8955	0.597015	0	38.5075	1.79104	1.49254	0	0		5.37313	42.3881	51.6418	0.597015
	C	1550	LPE	294	73.1293	9.18367	50	13.9456	8.5034	3.06122	5.44218	0	14.6259	14.6259	3.7415	0	0	3.7415	0	0	0	0		14.6259	12.2449	63.9456	9.18367
	C	1565	LPE	509	43.0255	5.10806	37.9175	0	8.44794	3.73281	4.71513	5.89391	33.3988	39.2927	2.94695	1.17878	0	1.76817	0	6.28684	0	0		40.8644	10.2161	43.8114	5.10806
	C	1575	LPE	326	93.5583	0	93.5583	0	0	0	0	6.44172	0	6.44172	0	0	0	0	0	0	0	0		0	0	100	0
	C	1580	LPE	261	96.9349	1.14943	95.7854	0	0	0	0	3.06513	0	3.06513	0	0	0	0	0	0	0	0		0	0	98.8506	1.14943
	C	1585	LPE	234	95.2991	2.13675	93.1624	0	0	0	0	4.70085	0	4.70085	0	0	0	0	0	0	0	0		0	0	97.8632	2.13675
	C	1590	LPE	310	85.1613	7.41935	75.1613	2.58065	0.322581	0.322581	0	12.9032	1.6129	14.5161	0	0	0	0	0	0	0	0		1.6129	0.322581	90.6452	7.41935
	C	1600	LPE	322	95.6522	1.86335	90.0621	3.72671	1.24224	0	1.24224	3.10559	0	3.10559	0	0	0	0	0	0	0	0		0	1.24224	96.8944	1.86335
	C	1610	LPE	371	100	12.4	87.6	0	0	0	0	0	0	0	0	0	0	0	0	0	0	0		0	0	87.6	12.4
